# Supplementary material for: Using deep learning to detect patients at risk for prostate cancer despite benign biopsies
Source: PubMed Central journal article supplement — iScience. 2022 Jun 23;25(7):104663. doi: 10.1016/j.isci.2022.104663 (PMC9272383; doi:10.1016/j.isci.2022.104663), 2022-06-23
Supplement: mmc1.pdf [file mmc1.pdf]

iScience, Volume 25

## **Supplemental information**

### **Using deep learning to detect patients at risk for prostate cancer despite benign biopsies**

**Bojing Liu, Yinxi Wang, Philippe Weitz, Johan Lindberg, Johan Hartman, Wanzhong Wang, Lars Egevad, Henrik Grönberg, Martin Eklund, and Mattias Rantalainen**

## Supplementary materials

**Table S1.** Sample distribution. Related to Figure 1.

|                                        | <b>Training set (training and validation)</b> | <b>Held-out test set</b> | <b>p-value</b>     |
|----------------------------------------|-----------------------------------------------|--------------------------|--------------------|
| <b>Prostate cancer, N (%)</b>          |                                               |                          |                    |
| No                                     | 546 (0.55)                                    | 133 (0.58)               |                    |
| Yes                                    | 665 (0.45)                                    | 164 (0.45)               | 0.976 <sup>1</sup> |
| ISUP 1                                 | 325 (0.27)                                    | 78 (0.26)                |                    |
| ISUP 2                                 | 121 (0.10)                                    | 32 (0.11)                |                    |
| ISUP 3                                 | 51 (0.04)                                     | 12 (0.04)                |                    |
| ISUP 4                                 | 127 (0.10)                                    | 32 (0.11)                |                    |
| ISUP 5                                 | 41 (0.03)                                     | 10 (0.03)                | 0.999 <sup>1</sup> |
| Mean cancer length, mean( $\pm$ SD)    | 0.43 ( $\pm$ 0.82)                            | 0.41 ( $\pm$ 0.85)       | 0.434 <sup>2</sup> |
| Maximum cancer length, mean( $\pm$ SD) | 2.67 ( $\pm$ 3.77)                            | 2.58 ( $\pm$ 3.66)       | 0.462 <sup>2</sup> |
| <b>Age (mean<math>\pm</math>SD)</b>    | 63.52 ( $\pm$ 5.30)                           | 63.14 ( $\pm$ 5.37)      | 0.119 <sup>2</sup> |
| <b>PSA (ng/ml), N (%)</b>              |                                               |                          |                    |
| [1,3)                                  | 361 (0.30)                                    | 91 (0.31)                |                    |
| [3,5)                                  | 508 (0.42)                                    | 125 (0.42)               |                    |
| [5,10)                                 | 256 (0.21)                                    | 63 (0.21)                |                    |
| [10,1e+04)                             | 86 (0.07)                                     | 18 (0.06)                | 0.934 <sup>1</sup> |

1.Chisq test, 2. Mann-Whitney U test

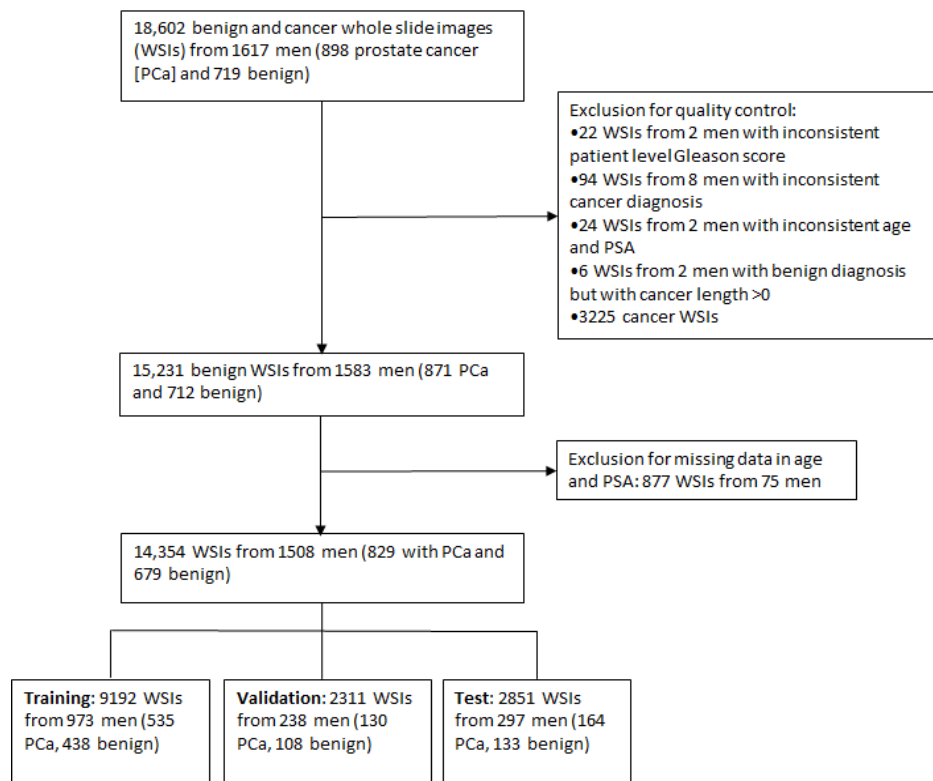

**eFigure 1.** Flow-chart. Related to Figure 1.

**Table S2.** Sensitivity by the International Society of Urological Pathology (ISUP) grading at different specificity levels in held-out test set. Related to Figure 2.

| Specificity | Sensitivity |        |        |        |        |
|-------------|-------------|--------|--------|--------|--------|
|             | ISUP 1      | ISUP 2 | ISUP 3 | ISUP 4 | ISUP 5 |
| 0.99        | 0.01        | 0.03   | 0.08   | 0.09   | 0.10   |
| 0.98        | 0.17        | 0.06   | 0.17   | 0.25   | 0.40   |
| 0.95        | 0.19        | 0.16   | 0.17   | 0.31   | 0.40   |
| 0.90        | 0.28        | 0.31   | 0.33   | 0.41   | 0.70   |

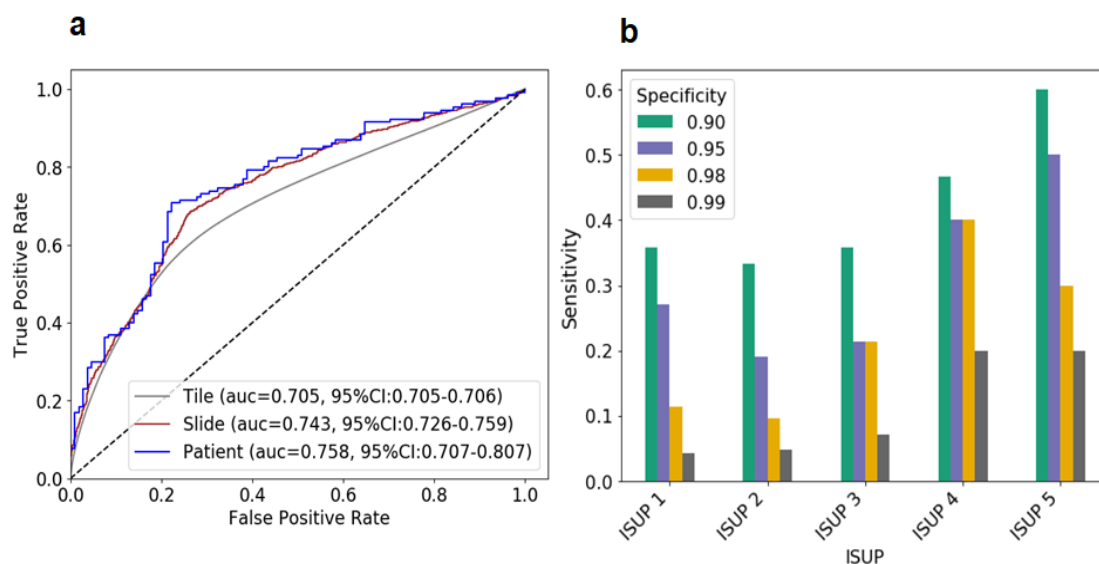

**Figure S2.** Prediction performance in validation set. Related to Figure 2. a) receiver operating characteristic (ROC) curves and associated area under the curve (AUC) estimates with bootstrap 95% confidence intervals in the validation set for the prediction of prostate cancer versus benign diagnosis on tile, slide, and patient level; b) corresponding sensitivity by the International Society of Urological Pathology grading groups at specificities of 0.99 (cutoff = 0.861), 0.98 (cutoff = 0.837), 0.95 (cutoff = 0.804), and 0.90 (cutoff = 0.744).

**Table S3.** Sensitivity by the International Society of Urological Pathology (ISUP) grading at different specificity levels in validation set. Related to Figure 2.

| Specificity | Sensitivity |        |        |        |        |
|-------------|-------------|--------|--------|--------|--------|
|             | ISUP 1      | ISUP 2 | ISUP 3 | ISUP 4 | ISUP 5 |
| 0.99        | 0.04        | 0.05   | 0.07   | 0.20   | 0.20   |
| 0.98        | 0.11        | 0.10   | 0.21   | 0.40   | 0.30   |
| 0.95        | 0.27        | 0.19   | 0.21   | 0.40   | 0.50   |
| 0.90        | 0.36        | 0.33   | 0.36   | 0.47   | 0.60   |
